# **RICHTLINIEN FÜR DIE REFERENTEN DER** **»GERMANISTIK«**

Die *Germanistik* stellt einschlägige neue Bücher in kritischen Referaten vor, nicht in Rezensionen, nicht in Abstracts. Aufgabe ist, über Gegenstand, Methode, Ziel und Ergebnis eines Buches zu informieren, dazu über seine Qualitäten und Mängel; die Forschungssituation kann von Belang sein; weniger wichtig sind der Verfasser und eigene Forschungsergebnisse des Referenten. Eine Gleichartigkeit im Aufbau der Referate liegt im Interesse der Benutzer: 1. Vorstellung, 2. Bewertung. Dabei soll erstere überwiegen. Da Kritik und Lob wenigstens andeutungsweise begründet werden sollen (sie müssen aber immer ausführlich begründbar sein) und da andererseits wenig Raum zur Verfügung steht, ist ein ausgewogenes, eher zurückhaltendes Urteil geboten, das sich nicht auf Nebensächlichkeiten stützt.- Ob es sich um eine Erstlingsarbeit oder das Werk eines Nichtdeutschen handelt, mag ebenso wie die Zielgruppe durchaus zu berücksichtigen sein. Das Referat soll einem Buch (und seinem Verfasser) gerecht werden. Die Disposition eines Buches kann charakteristisch sein; das Inhaltsverzeichnis wiederzugeben, noch dazu mit Seitenangaben, erscheint jedoch wenig sinnvoll, wenn nicht Proportionen oder Disproportionen daraus deutlich werden. Ein Übermaß von Zitaten (gar statt des Referates) ist nicht angezeigt. Fachjargon ist zu vermeiden, wenigstens um der Leser willen, die nicht Deutsch als Muttersprache sprechen. Bei Ausgaben kommt es, außer bei unbekanntem Texten, nicht auf die Charakterisierung von Texten und Dichtern an, sondern auf die Edition.- Bei Sammelwerken soll statt eines Aufzählens der Beiträge (zumal wenn diese in der Germanistik einzeln verzeichnet sind) eine zusammenfassende Darstellung gegeben, eventuell das Neue, Herausragende oder Strittige hervorgehoben werden. Konstellationen, die Befangenheit begründen können (z.B. Freundschaft, Feindschaft, bestehende oder frühere Abhängigkeit), schließen ein Referat in der Germanistik aus.- Mehrfachbesprechungen eines Buches durch die gleiche Person sind unerwünscht, ebenso Absprachen zwischen Referenten und Verfassern bzw. Verlagen.

## **Richtlinien für die Manuskriptgestaltung**

### **1. Manuskriptform und Umfang**

Es ist aus Kostengründen fortan nicht mehr möglich, maschinenschriftliche Typoskripte anzunehmen.

Um den Konvertierungsaufwand gering zu halten, sind die Referate in digitaler Form, als Attachment per

E-Mail oder auf einer Diskette in Form einer Word, WordPerfect oder RTF-Datei einzureichen.

Der Umfang der kritischen Referate ist pro Beitrag auf **15** Zeilen (bzw. 1100 Zeichen) begrenzt. (Ausnahmen: bis zu **25** Zeilen bzw. 1800 Zeichen.)

Der fortlaufende Text soll **keine** zusätzlichen Formatierungen, Absätze, Absatzmarken am Zeilenende, Tabulatoren, feste Ausschlüsse u.ä. enthalten.

Der Name des Referenten (mit Ortsangabe, jedoch ohne akademische Titel) erhält eine eigene Textzeile.

## 2. Rechtschreibung

Die *Germanistik* druckt deutschsprachige Beiträge nach wie vor in der alten Rechtschreibung. Zitate werden in der jeweiligen Rechtschreibung der Quelle wiedergegeben.

## 3. Hinweise zu Dissertationen und Habilitationsschriften

Bei der Besprechung von Dissertationen und Habil.-Schriften ist der Hochschulschriftenvermerk in das Referat einzufügen. Beispiel:

Die vorl. Monographie (zugl. Univ. Göttingen, Habil.-Schrift, 1996) entwickelt ... .  
Die Studie (zugl. Univ. Tübingen, Diss., 1997) ... .

## 4. Hervorhebungen

**Titel** werden im Text immer in Kursivschrift gesetzt (Beispiel: Im *Iwein* finden sich [...]; G. v. Wilperts *Sachwörterbuch der Literatur*). Objektsprachliche Wörter können ebenfalls kursiv gesetzt werden.

Darüber hinaus sind **keine** Kursivhervorhebungen möglich. Bitte verwenden Sie keinen Fettsatz, keine Unterstreichungen und keine Sperrungen. Wörter, auf deren akzidentielle Bedeutung aufmerksam gemacht werden soll, lexikalische Bedeutungsangaben, Redewendungen u.ä. können durch '...' hervorgehoben werden (im Druck □...□ z.B.: □close reading□).

## 5. Zitate/Anmerkungen/Literaturhinweise

Wörtliche Zitate aus Primärtexten sowie aus wissenschaftlichem Schrifttum (auch zitierte Kapitelüberschriften u.ä.) werden in " ..." eingeschlossen (im Druck »...«); Zusätze erscheinen in eckigen Klammern; für Auslassungen steht [...]. Neben den in eckigen Klammern erscheinenden Zusätzen und Auslassungen werden im Manuskript nur runde Klammern verwendet (z.B. für bibliographische Angaben). Schachtelungen innerhalb von Klammern sind nach Möglichkeit zu vermeiden. Fußnoten oder Literaturlisten am Ende der Beiträge sind nicht zugelassen. Bibliographische Angaben sowie kurze Stellenangaben werden immer ohne Zusatz von "S." unmittelbar dem Text eingefügt. Beispiele:

"mit Unsinn gespickt" (13f.)

"Die Literaturgeschichte kennt ihn v.a. als Verf. eines Schäferromans (*Elbianische Florabella*, 1667)". (276)

(vgl. Quellenverz., 369-402)

(vgl. *Germanistik* 41. 2000. Nr. 6906)

## 6. Sonderzeichen

Sonderzeichen müssen besonders gut lesbar sein und sollten eventuell auf einem eigenen Blatt erläutert werden.

## 7. Schreibung von Namen

Die **Namen von Dichtern** werden bei der ersten Nennung im Referat vollständig angeführt und ab der zweiten bzw. bei wiederholter Nennung gekürzt, z. B.:

Brecht schrieb im Jahr [...]. B. gehört zu den Autoren [...]. B.s *Kinderhymne* erschien [...]. Die bisherigen B.-Ausgaben [...]. Die B.schen Schreibprozesse [...].

Die **Namen von Verfassern von Sekundärliteratur** werden dagegen im gesamten Manuskript, d.h. auch bei wiederholter Nennung, ausgeschrieben, deren **Vornamen** jedoch grundsätzlich nur in abgekürzter Form wiedergegeben.

## 8. Abkürzungen und Zahlenangaben

Bitte achten Sie auf eine einheitliche Anwendung der Abkürzungen in den Manuskripten. Abkürzungen - bis auf die allgemein üblichen (Siglen für die gängigen Zeitschriften u.ä.) - sollten vermieden werden; also z.B. **nicht**: Der Verf. d. *St. Trup. HL* u.ä.

### Es gelten folgende Abkürzungen:

Abb., Anm., Aufl., Ausg., Bd., Bde., Diss., Einl., Kap., Habil.-Schrift, hist.-krit. Ausg., Hrsg., Hs., Hss., Jh., Lfg., Lit.verz., MA., Verf., Verz., vorl. Studie.

Die Abkürzung a.a.O. soll nicht verwendet werden.

Zahlenangaben erscheinen als arabische Ziffer (im 9. Jh.; 13 Kap.; die 230seitige Studie; im 5. Bd./Kap./Teil).

Um eine zureichende Planung zu ermöglichen, ist es erforderlich, daß die Manuskripte zum **mitgeteilten Lieferungstermin** eingereicht werden. Die Bestätigung des Annahme der Referate erfolgt mit dem Versand der Korrekturfahnen. Die Referenten werden gebeten, die Korrekturfahnen **sorgfältig gegenzulesen** und die korrigierte Druckvorlage termingemäß an die Redaktion zurückzusenden.

*Herausgeber und Redaktion*
